# Supplementary material for: Serum metabolomics analysis reveals impaired lipid metabolism in rats after oral exposure to benzo( a )pyrene
Source: Royal Society of Chemistry journal article supplement (doi:10.1039/c4mb00565a), 2014-11-26

**Electronic Supplementary Information**

**Serum metabolomics analysis reveals oral exposure to  
benzo(a)pyrene impaired lipid metabolism in rats**

Xiaoxue Wang, Jie Zhang\*, Qingyu Huang, Ambreen Alamdar, Meiping Tian, Liangpo Liu,

Heqing Shen\*

*Key Lab of Urban Environment and Health, Institute of Urban Environment,*

*Chinese Academy of Sciences, Xiamen, PR China, 361021*

\*To whom correspondence may be addressed:

Prof. Jie Zhang, Institute of Urban Environment, Chinese Academy of Sciences, 1799 Jimei Road,  
Xiamen, 361021, China; Tel/Fax: (86)-592-6190523; E-mail: jzhang@iue.ac.cn

Prof. Heqing Shen, Institute of Urban Environment, Chinese Academy of Sciences, 1799 Jimei  
Road, Xiamen, 361021, China; Tel/Fax: (86)-592-6190997; E-mail: hqshen@iue.ac.cn

**Supplementary Tables****Table S-1.** MS and MS/MS information of tentatively identified biomarkers.

| No. | Metabolite       | Chemical formula | Measured mass(Da) | Adduct MW(Da) | MW<br>Difference(Da) | MS/MS fragment                                                        |
|-----|------------------|------------------|-------------------|---------------|----------------------|-----------------------------------------------------------------------|
| 1   | LysoPC(18:0)     | C26H54NO7P       | 524.3654          | 524.3711      | 0.0057               | 524(100), 87(69), 523(28), 149(24), 101(19), 73(14)                   |
| 2   | LysoPC(18:2)     | C26H50NO7P       | 520.3342          | 520.3398      | 0.0056               | 520(100), 521(27), 87(14)                                             |
| 3   | LysoPC(20:4)     | C28H50NO7P       | 544.3336          | 544.3398      | 0.0062               | 544(100), 87(44), 149(34), 545(31), 163(29), 568(29), 73(20), 101(10) |
| 4   | PC(36:2)         | C44H84NO8P       | 786.5929          | 785.5935      | 0.0078               | 87(100), 149(47), 101(27), 141(32), 73(27)                            |
| 5   | Sphinganine      | C18H39NO2        | 302.3022          | 302.3055      | 0.0032               | 302(100), 284(97), 258(88), 141(37), 163(35), 390(28), 279(28)        |
| 6   | L-Valine         | C5H11NO2         | 118.0849          | 118.0863      | 0.0014               | 61(100), 118(88), 132(54), 73(41), 149(60), 116(30), 80(27)           |
| 7   | Phytosphingosine | C18H39NO3        | 318.2968          | 318.3003      | 0.0035               | 318(100), 149(34), 319(19), 163(12), 279(10)                          |
| 8   | Cytosine         | C4H5N3O          | 112.0493          | 112.0505      | 0.0012               | 73(100), 149(97), 163(84), 112(81), 61(96), 131(21), 279(19)          |
| 9   | Cer(d18:0/14:0)  | C32H65NO3        | 512.5             | 512.5037      | 0.0037               | 87(100), 282(95), 149(43), 101(27), 73(26), 141(30)                   |
| 10  | Palmitic amide   | C16H33NO         | 256.2611          | 256.2635      | 0.0024               | 256(100), 87(92), 149(38), 73(24), 101(23)                            |
| 11  | LysoPC(20:3)     | C28H52NO7P       | 546.3464          | 546.3554      | 0.0090               | 496(100), 87(30), 497(26), 149(20), 73(12)                            |
| 12  | LysoPC(18:3)     | C26H48NO7P       | 518.32            | 518.3241      | 0.0041               | 496(100), 87(48), 149(27), 497(26), 73(17), 101(11)                   |

## Supplementary Figures

**Figure S1.** The total ion chromatograms (TIC) of quality control samples injected in negative (A) and positive (B) ESI mode. In negative ESI mode, the maximum intensity of spectrum peak was just equal to the baseline level of intensity of spectrum peak in positive ESI mode. Therefore, positive ESI mode was conducted to acquire metabolite profiling.

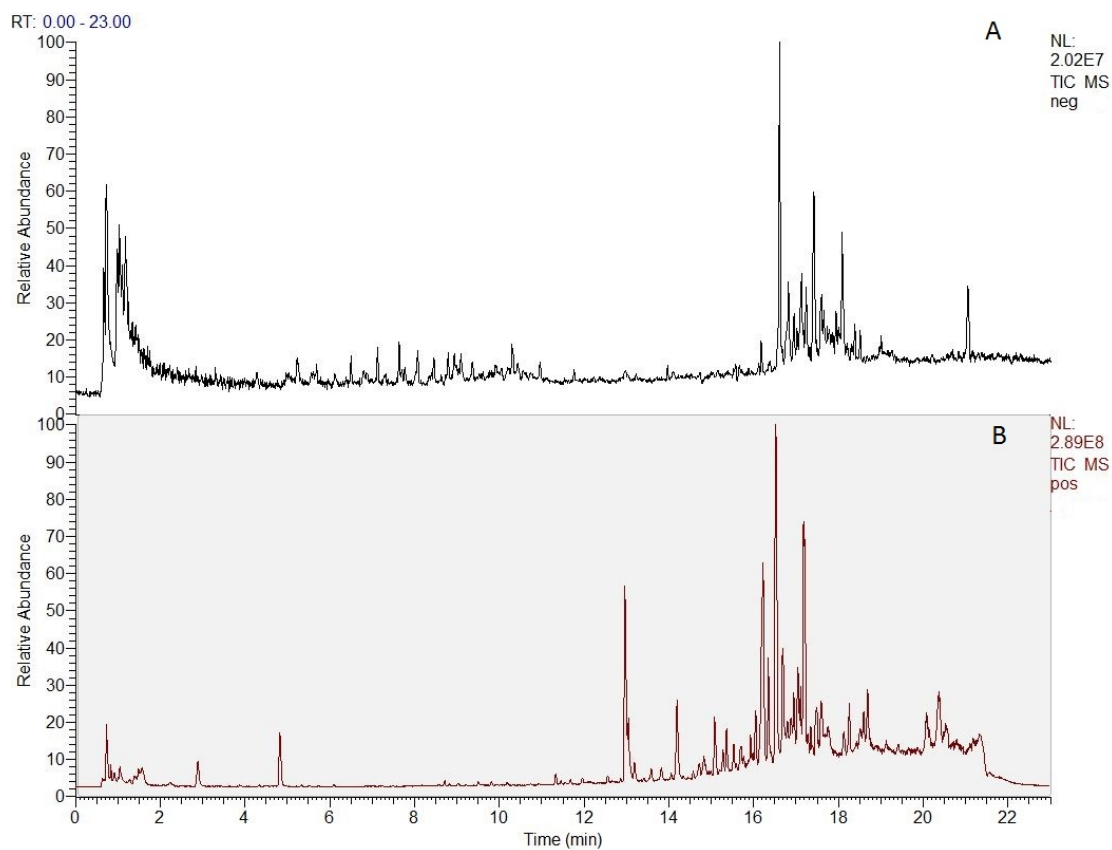

**Figure S2.** Scoring plots of PCA analysis for all the samples. ● QC sampels; ◆ control and dose groups. QC sampels showed a tight cluster, suggesting the method had good repeatability.

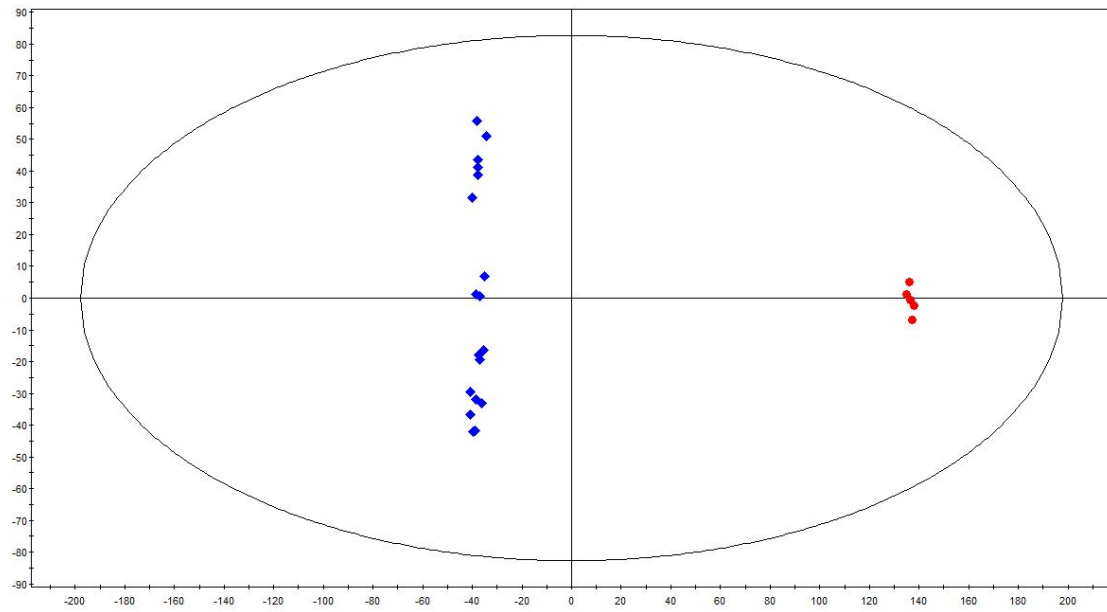

**Figure S3.** Random permutation-test results (n=200) of the PLS-DA model. The Y-axis intercepts were: R2(0, 0.85), Q2(0, -0.15). The calculated R2 and Q2 values were lower than the original ones in the validation plot and the Q2 intercepted the vertical axis was below zero, so the model was considered valid.

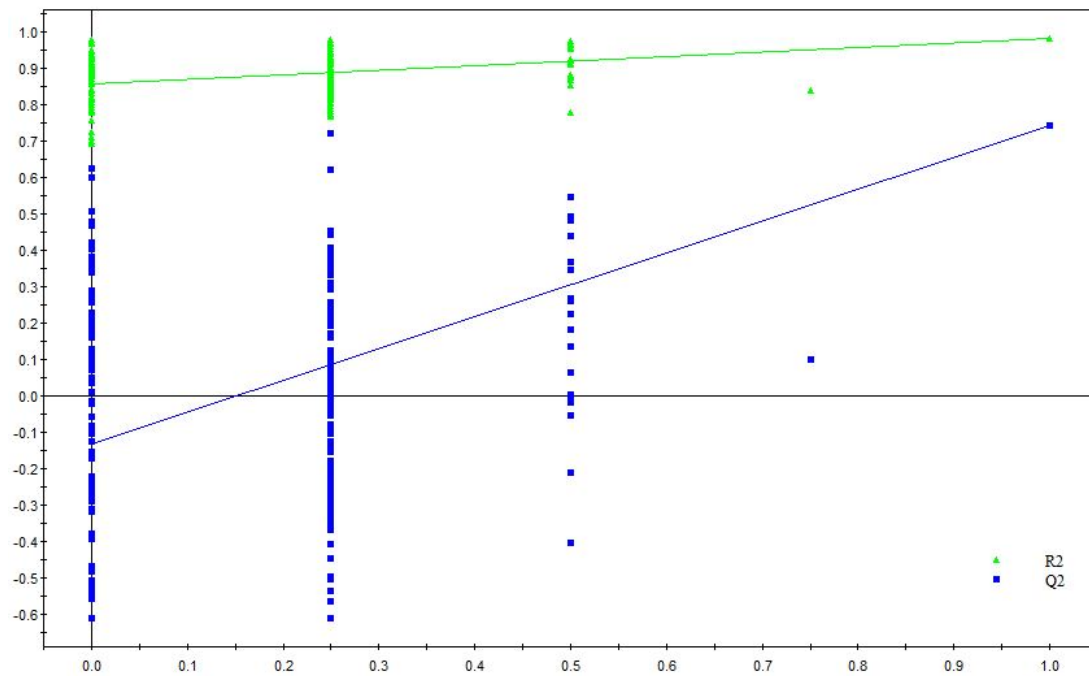

**Figure S4.** CV values of the variables extracted from serum metabolic profile.

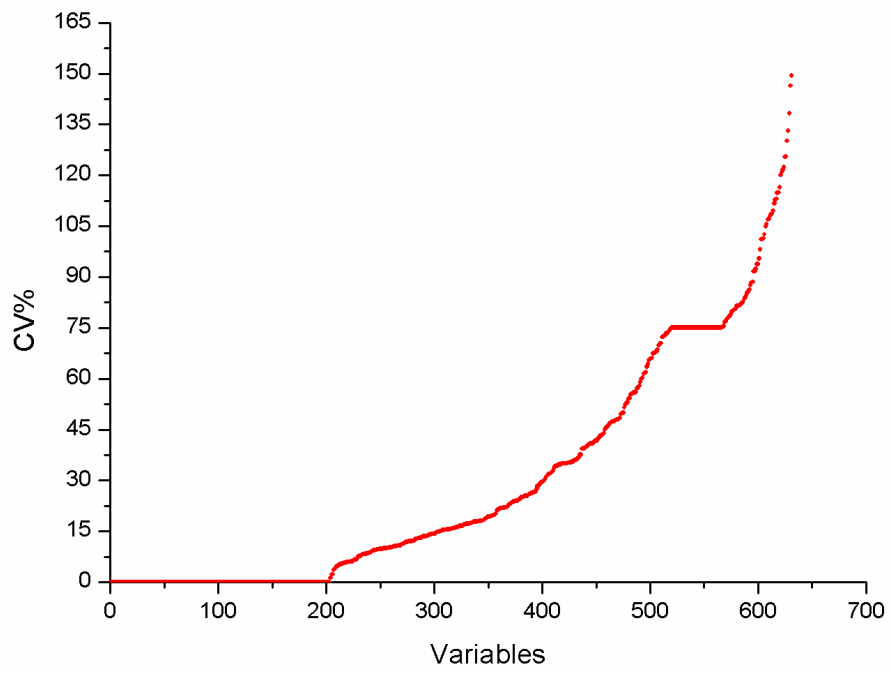

**Figure S5.** Organ coefficients of liver (multiplied by 1000 times) following B(a)P exposure.

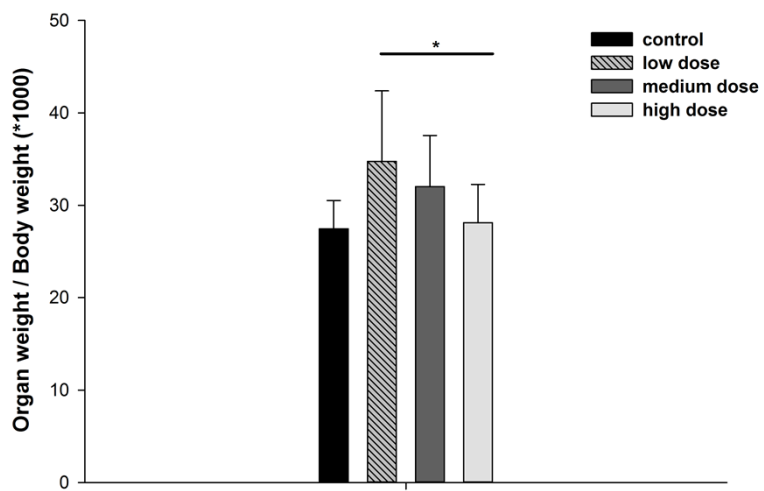

**Figure S6.** Effects of B(a)P exposure on hepatic mRNA expression of *chpt1*, *pent*, *lpcat1/2*, *pla2*.  
\*p < 0.05.

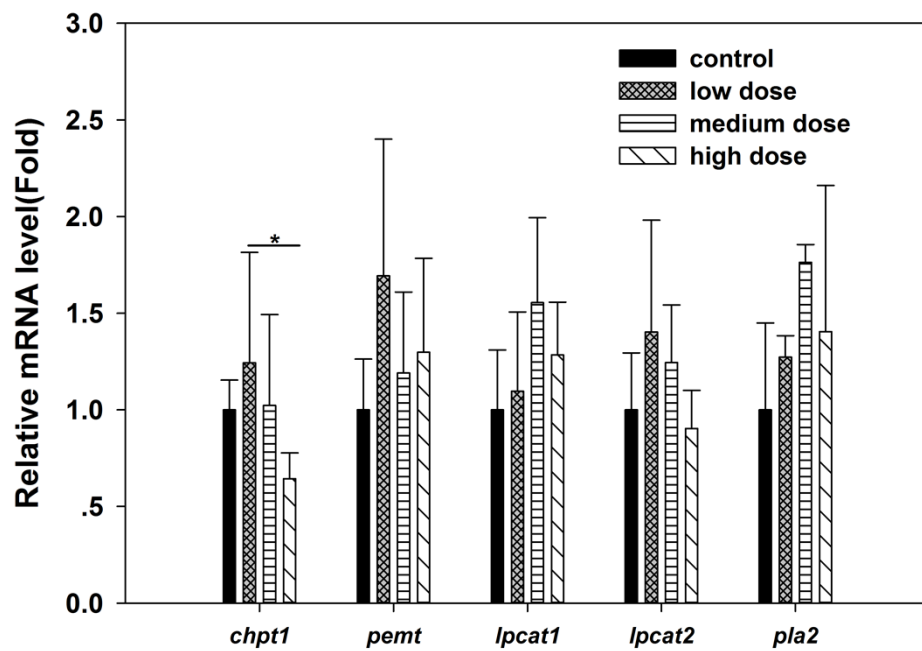

Supplement: c4mb00565a1.pdf [file c4mb00565a1.pdf]
